# Supplementary material
Source: publisher figshare collection journal article supplement (https://acs.figshare.com/ndownloader/files/6451077)
Supplement: Supplementary file 1 [file 6451077]

 
data_52 
 
_audit_creation_method            SHELXL-97 
_chemical_name_systematic 
; 
 ? 
; 
_chemical_name_common             ? 
_chemical_melting_point           ? 
_chemical_formula_moiety          ? 
_chemical_formula_sum 
 'C26 H18 N13 O Sm' 
_chemical_formula_weight          678.88 
 
loop_ 
 _atom_type_symbol 
 _atom_type_description 
 _atom_type_scat_dispersion_real 
 _atom_type_scat_dispersion_imag 
 _atom_type_scat_source 
 'C'  'C'   0.0033   0.0016 
 'International Tables Vol C Tables 4.2.6.8 and 6.1.1.4' 
 'H'  'H'   0.0000   0.0000 
 'International Tables Vol C Tables 4.2.6.8 and 6.1.1.4' 
 'N'  'N'   0.0061   0.0033 
 'International Tables Vol C Tables 4.2.6.8 and 6.1.1.4' 
 'O'  'O'   0.0106   0.0060 
 'International Tables Vol C Tables 4.2.6.8 and 6.1.1.4' 
 'Sm'  'Sm'  -0.1638   3.4418 
 'International Tables Vol C Tables 4.2.6.8 and 6.1.1.4' 
 
_symmetry_cell_setting            orthorhombic 
_symmetry_space_group_name_H-M    Pnna 
 
loop_ 
 _symmetry_equiv_pos_as_xyz 
 'x, y, z' 
 '-x+1/2, -y, z' 
 '-x+1/2, y+1/2, -z+1/2' 
 'x, -y+1/2, -z+1/2' 
 '-x, -y, -z' 
 'x-1/2, y, -z' 
 'x-1/2, -y-1/2, z-1/2' 
 '-x, y-1/2, z-1/2' 
 
_cell_length_a                    11.378(2) 
_cell_length_b                    15.625(3) 
_cell_length_c                    16.048(3) 
_cell_angle_alpha                 90.00 
_cell_angle_beta                  90.00 
_cell_angle_gamma                 90.00 
_cell_volume                      2853.0(10) 
_cell_formula_units_Z             4 
_cell_measurement_temperature     293(2) 
_cell_measurement_reflns_used     ? 
_cell_measurement_theta_min       ? 
_cell_measurement_theta_max       ? 
 
_exptl_crystal_description        ? 
_exptl_crystal_colour             ? 
_exptl_crystal_size_max           ? 
_exptl_crystal_size_mid           ? 
_exptl_crystal_size_min           ? 
_exptl_crystal_density_meas       ? 
_exptl_crystal_density_diffrn     1.581 
_exptl_crystal_density_method     'not measured' 
_exptl_crystal_F_000              1340 
_exptl_absorpt_coefficient_mu     2.103 
_exptl_absorpt_correction_type    ? 
_exptl_absorpt_correction_T_min   ? 
_exptl_absorpt_correction_T_max   ? 
_exptl_absorpt_process_details    ? 
 
_exptl_special_details 
; 
 ? 
; 
 
_diffrn_ambient_temperature       293(2) 
_diffrn_radiation_wavelength      0.71073 
_diffrn_radiation_type            MoK\a 
_diffrn_radiation_source          'fine-focus sealed tube' 
_diffrn_radiation_monochromator   graphite 
_diffrn_measurement_device_type   ? 
_diffrn_measurement_method        ? 
_diffrn_detector_area_resol_mean  ? 
_diffrn_standards_number          ? 
_diffrn_standards_interval_count  ? 
_diffrn_standards_interval_time   ? 
_diffrn_standards_decay_%         ? 
_diffrn_reflns_number             15342 
_diffrn_reflns_av_R_equivalents   0.0470 
_diffrn_reflns_av_sigmaI/netI     0.0438 
_diffrn_reflns_limit_h_min        -13 
_diffrn_reflns_limit_h_max        13 
_diffrn_reflns_limit_k_min        -17 
_diffrn_reflns_limit_k_max        18 
_diffrn_reflns_limit_l_min        -17 
_diffrn_reflns_limit_l_max        19 
_diffrn_reflns_theta_min          3.37 
_diffrn_reflns_theta_max          25.02 
_reflns_number_total              2497 
_reflns_number_gt                 2063 
_reflns_threshold_expression      >2sigma(I) 
 
_computing_data_collection        ? 
_computing_cell_refinement        ? 
_computing_data_reduction         ? 
_computing_structure_solution     'SHELXS-97 (Sheldrick, 1990)' 
_computing_structure_refinement   'SHELXL-97 (Sheldrick, 1997)' 
_computing_molecular_graphics     ? 
_computing_publication_material   ? 
 
_refine_special_details 
; 
 Refinement of F^2^ against ALL reflections.  The weighted R-factor wR and 
 goodness of fit S are based on F^2^, conventional R-factors R are based 
 on F, with F set to zero for negative F^2^. The threshold expression of 
 F^2^ > 2sigma(F^2^) is used only for calculating R-factors(gt) etc. and is 
 not relevant to the choice of reflections for refinement.  R-factors based 
 on F^2^ are statistically about twice as large as those based on F, and R- 
 factors based on ALL data will be even larger. 
; 
 
_refine_ls_structure_factor_coef  Fsqd  
_refine_ls_matrix_type            full 
_refine_ls_weighting_scheme       calc  
_refine_ls_weighting_details 
 'calc w=1/[\s^2^(Fo^2^)+(0.0561P)^2^+12.4486P] where P=(Fo^2^+2Fc^2^)/3' 
_atom_sites_solution_primary      direct 
_atom_sites_solution_secondary    difmap 
_atom_sites_solution_hydrogens    geom 
_refine_ls_hydrogen_treatment     mixed 
_refine_ls_extinction_method      none 
_refine_ls_extinction_coef        ? 
_refine_ls_number_reflns          2497 
_refine_ls_number_parameters      187 
_refine_ls_number_restraints      0 
_refine_ls_R_factor_all           0.0517 
_refine_ls_R_factor_gt            0.0429 
_refine_ls_wR_factor_ref          0.1218 
_refine_ls_wR_factor_gt           0.1097 
_refine_ls_goodness_of_fit_ref    1.067 
_refine_ls_restrained_S_all       1.067 
_refine_ls_shift/su_max           0.002 
_refine_ls_shift/su_mean          0.000 
 
loop_ 
 _atom_site_label 
 _atom_site_type_symbol 
 _atom_site_fract_x 
 _atom_site_fract_y 
 _atom_site_fract_z 
 _atom_site_U_iso_or_equiv 
 _atom_site_adp_type 
 _atom_site_occupancy 
 _atom_site_symmetry_multiplicity 
 _atom_site_calc_flag 
 _atom_site_refinement_flags 
 _atom_site_disorder_assembly 
 _atom_site_disorder_group 
Sm1 Sm 0.597151(12) 0.2500 0.2500 0.02400(5) Uani 1 2 d S . . 
N1 N 0.7192(2) 0.18878(13) 0.38071(13) 0.0441(6) Uani 1 1 d . . . 
N2 N 0.52891(19) 0.29360(13) 0.40094(13) 0.0434(6) Uani 1 1 d . . . 
C1 C 0.8095(3) 0.1353(2) 0.3721(2) 0.0771(11) Uani 1 1 d . . . 
H1A H 0.8345 0.1220 0.3185 0.093 Uiso 1 1 calc R . . 
C2 C 0.8687(4) 0.0981(3) 0.4387(3) 0.1119(14) Uani 1 1 d . . . 
H2A H 0.9308 0.0606 0.4296 0.134 Uiso 1 1 calc R . . 
C3 C 0.8335(5) 0.1180(3) 0.5174(3) 0.1161(17) Uani 1 1 d . . . 
H3A H 0.8707 0.0939 0.5634 0.139 Uiso 1 1 calc R . . 
C4 C 0.7428(4) 0.1737(3) 0.5276(2) 0.0906(14) Uani 1 1 d . . . 
H4A H 0.7179 0.1882 0.5810 0.109 Uiso 1 1 calc R . . 
C5 C 0.6869(3) 0.20936(18) 0.45856(17) 0.0496(8) Uani 1 1 d . . . 
C6 C 0.5920(3) 0.2725(2) 0.46868(19) 0.0544(9) Uani 1 1 d . . . 
C7 C 0.5720(3) 0.3125(3) 0.5450(2) 0.0903(14) Uani 1 1 d . . . 
H7A H 0.6180 0.2993 0.5911 0.108 Uiso 1 1 calc R . . 
C8 C 0.4825(4) 0.3723(3) 0.5511(2) 0.1141(16) Uani 1 1 d . . . 
H8A H 0.4672 0.3991 0.6017 0.137 Uiso 1 1 calc R . . 
C9 C 0.4184(3) 0.3913(3) 0.4839(2) 0.0842(12) Uani 1 1 d . . . 
H9A H 0.3583 0.4315 0.4872 0.101 Uiso 1 1 calc R . . 
C10 C 0.4422(3) 0.3509(2) 0.41001(19) 0.0570(9) Uani 1 1 d . . . 
H10A H 0.3960 0.3638 0.3639 0.068 Uiso 1 1 calc R . . 
N3 N 0.51819(19) 0.10506(13) 0.28726(15) 0.0467(6) Uani 1 1 d . . . 
N4 N 0.4658(3) -0.04313(19) 0.2630(3) 0.1059(16) Uani 1 1 d . . . 
N5 N 0.2831(3) -0.1188(2) 0.2565(2) 0.0801(11) Uani 1 1 d . . . 
N6 N 0.7338(2) 0.13941(13) 0.19004(14) 0.0464(6) Uani 1 1 d . . . 
N7 N 0.7500 0.0000 0.12138(19) 0.0501(10) Uani 1 2 d S . . 
C11 C 0.4858(2) 0.03693(17) 0.2775(2) 0.0474(8) Uani 1 1 d . . . 
C12 C 0.3643(3) -0.07804(17) 0.26121(19) 0.0505(8) Uani 1 1 d . . . 
C13 C 0.7411(2) 0.07180(15) 0.16100(15) 0.0358(6) Uani 1 1 d . . . 
O1W O 0.3813(2) 0.2500 0.2500 0.0417(8) Uani 1 2 d S . . 
 
loop_ 
 _atom_site_aniso_label 
 _atom_site_aniso_U_11 
 _atom_site_aniso_U_22 
 _atom_site_aniso_U_33 
 _atom_site_aniso_U_23 
 _atom_site_aniso_U_13 
 _atom_site_aniso_U_12 
Sm1 0.03061(9) 0.01807(8) 0.02332(9) -0.00344(5) 0.000 0.000 
N1 0.0635(13) 0.0310(10) 0.0380(11) -0.0020(9) -0.0105(10) -0.0006(10) 
N2 0.0523(12) 0.0346(10) 0.0432(11) -0.0087(9) 0.0111(10) -0.0064(10) 
C1 0.101(2) 0.0720(19) 0.0587(18) -0.0165(15) -0.0287(17) 0.0406(17) 
C2 0.136(3) 0.108(3) 0.092(3) -0.016(2) -0.056(2) 0.070(2) 
C3 0.171(4) 0.103(3) 0.074(2) 0.018(2) -0.052(2) 0.037(3) 
C4 0.124(3) 0.106(3) 0.0425(17) 0.0136(18) -0.019(2) 0.016(3) 
C5 0.0611(16) 0.0440(14) 0.0437(14) 0.0027(12) -0.0062(13) -0.0101(13) 
C6 0.0534(16) 0.0762(17) 0.0335(14) -0.0079(15) 0.0061(12) -0.0159(14) 
C7 0.074(2) 0.148(4) 0.0494(18) -0.030(2) 0.0056(17) -0.008(3) 
C8 0.078(2) 0.194(4) 0.070(2) -0.074(2) 0.0162(18) 0.004(3) 
C9 0.069(2) 0.107(3) 0.076(2) -0.0395(19) 0.0172(17) 0.008(2) 
C10 0.0530(15) 0.0642(18) 0.0538(16) -0.0135(14) 0.0137(14) 0.0016(14) 
N3 0.0437(11) 0.0349(10) 0.0616(14) 0.0062(10) -0.0015(11) -0.0092(9) 
N4 0.0529(16) 0.0336(14) 0.231(4) -0.0153(18) -0.017(2) -0.0041(13) 
N5 0.0668(17) 0.0565(16) 0.117(3) -0.0064(15) 0.0000(16) -0.0239(14) 
N6 0.0586(12) 0.0325(10) 0.0482(12) -0.0040(9) 0.0057(10) 0.0188(10) 
N7 0.084(2) 0.0301(15) 0.0361(16) 0.000 0.000 0.0007(16) 
C11 0.0347(12) 0.0347(13) 0.0728(17) 0.0064(13) -0.0027(13) -0.0017(11) 
C12 0.0483(14) 0.0263(12) 0.0768(19) -0.0008(12) 0.0003(14) -0.0069(12) 
C13 0.0358(11) 0.0366(11) 0.0351(12) 0.0070(10) 0.0036(10) 0.0084(10) 
O1W 0.0338(11) 0.0374(14) 0.0539(18) -0.0043(10) 0.000 0.000 
 
_geom_special_details 
; 
 All esds (except the esd in the dihedral angle between two l.s. planes) 
 are estimated using the full covariance matrix.  The cell esds are taken 
 into account individually in the estimation of esds in distances, angles 
 and torsion angles; correlations between esds in cell parameters are only 
 used when they are defined by crystal symmetry.  An approximate (isotropic) 
 treatment of cell esds is used for estimating esds involving l.s. planes. 
; 
 
loop_ 
 _geom_bond_atom_site_label_1 
 _geom_bond_atom_site_label_2 
 _geom_bond_distance 
 _geom_bond_site_symmetry_2 
 _geom_bond_publ_flag 
Sm1 O1W 2.456(3) . ? 
Sm1 N3 2.509(2) . ? 
Sm1 N3 2.509(2) 4 ? 
Sm1 N6 2.516(2) 4 ? 
Sm1 N6 2.516(2) . ? 
Sm1 N2 2.633(2) 4 ? 
Sm1 N2 2.633(2) . ? 
Sm1 N1 2.691(2) 4 ? 
Sm1 N1 2.691(2) . ? 
N1 C1 1.332(4) . ? 
N1 C5 1.341(3) . ? 
N2 C10 1.340(4) . ? 
N2 C6 1.344(4) . ? 
C1 C2 1.389(5) . ? 
C2 C3 1.362(6) . ? 
C3 C4 1.360(6) . ? 
C4 C5 1.394(5) . ? 
C5 C6 1.472(4) . ? 
C6 C7 1.393(5) . ? 
C7 C8 1.385(6) . ? 
C8 C9 1.335(6) . ? 
C9 C10 1.371(5) . ? 
N3 C11 1.137(3) . ? 
N4 C12 1.277(4) . ? 
N4 C11 1.293(4) . ? 
N5 C12 1.125(4) . ? 
N6 C13 1.158(3) . ? 
N7 C13 1.294(3) . ? 
N7 C13 1.294(3) 2_655 ? 
 
loop_ 
 _geom_angle_atom_site_label_1 
 _geom_angle_atom_site_label_2 
 _geom_angle_atom_site_label_3 
 _geom_angle 
 _geom_angle_site_symmetry_1 
 _geom_angle_site_symmetry_3 
 _geom_angle_publ_flag 
O1W Sm1 N3 69.01(5) . . ? 
O1W Sm1 N3 69.01(5) . 4 ? 
N3 Sm1 N3 138.03(10) . 4 ? 
O1W Sm1 N6 128.18(5) . 4 ? 
N3 Sm1 N6 138.61(7) . 4 ? 
N3 Sm1 N6 72.10(7) 4 4 ? 
O1W Sm1 N6 128.18(5) . . ? 
N3 Sm1 N6 72.10(7) . . ? 
N3 Sm1 N6 138.61(7) 4 . ? 
N6 Sm1 N6 103.64(10) 4 . ? 
O1W Sm1 N2 72.85(5) . 4 ? 
N3 Sm1 N2 83.11(7) . 4 ? 
N3 Sm1 N2 84.76(7) 4 4 ? 
N6 Sm1 N2 135.38(7) 4 4 ? 
N6 Sm1 N2 69.68(7) . 4 ? 
O1W Sm1 N2 72.85(5) . . ? 
N3 Sm1 N2 84.76(7) . . ? 
N3 Sm1 N2 83.11(7) 4 . ? 
N6 Sm1 N2 69.68(7) 4 . ? 
N6 Sm1 N2 135.38(7) . . ? 
N2 Sm1 N2 145.70(10) 4 . ? 
O1W Sm1 N1 121.06(5) . 4 ? 
N3 Sm1 N1 133.74(7) . 4 ? 
N3 Sm1 N1 71.23(7) 4 4 ? 
N6 Sm1 N1 74.64(7) 4 4 ? 
N6 Sm1 N1 68.10(7) . 4 ? 
N2 Sm1 N1 61.78(7) 4 4 ? 
N2 Sm1 N1 141.00(6) . 4 ? 
O1W Sm1 N1 121.06(5) . . ? 
N3 Sm1 N1 71.23(7) . . ? 
N3 Sm1 N1 133.74(7) 4 . ? 
N6 Sm1 N1 68.10(7) 4 . ? 
N6 Sm1 N1 74.64(7) . . ? 
N2 Sm1 N1 141.00(6) 4 . ? 
N2 Sm1 N1 61.78(7) . . ? 
N1 Sm1 N1 117.87(10) 4 . ? 
C1 N1 C5 117.3(2) . . ? 
C1 N1 Sm1 122.72(19) . . ? 
C5 N1 Sm1 119.96(18) . . ? 
C10 N2 C6 118.0(2) . . ? 
C10 N2 Sm1 119.33(18) . . ? 
C6 N2 Sm1 121.54(18) . . ? 
N1 C1 C2 123.8(3) . . ? 
C3 C2 C1 118.4(4) . . ? 
C4 C3 C2 118.7(4) . . ? 
C3 C4 C5 120.4(3) . . ? 
N1 C5 C4 121.3(3) . . ? 
N1 C5 C6 117.7(2) . . ? 
C4 C5 C6 121.0(3) . . ? 
N2 C6 C7 120.9(3) . . ? 
N2 C6 C5 117.8(3) . . ? 
C7 C6 C5 121.2(3) . . ? 
C8 C7 C6 119.1(3) . . ? 
C9 C8 C7 119.6(4) . . ? 
C8 C9 C10 119.2(4) . . ? 
N2 C10 C9 123.2(3) . . ? 
C11 N3 Sm1 158.2(2) . . ? 
C12 N4 C11 125.2(3) . . ? 
C13 N6 Sm1 145.5(2) . . ? 
C13 N7 C13 121.1(3) . 2_655 ? 
N3 C11 N4 171.0(3) . . ? 
N5 C12 N4 170.4(4) . . ? 
N6 C13 N7 174.3(3) . . ? 
 
_diffrn_measured_fraction_theta_max    0.988 
_diffrn_reflns_theta_full              25.02 
_diffrn_measured_fraction_theta_full   0.988 
_refine_diff_density_max    1.914 
_refine_diff_density_min   -1.073 
_refine_diff_density_rms    0.104 
